# Supplementary material for: Synergistic effect of endurance training and nettle leaf extract on the IDO1-KYN-AHR pathway homeostasis and inhibiting of liver toxicity in rats with STZ-induced diabetes
Source: Frontiers journal article supplement (doi:10.3389/fendo.2023.1071424), 2023-05-26
Supplement: Data_Sheet_1.zip [file Data_Sheet_1.zip]

## Sheet: 10129
	ToppFun identified abnormalities associated with predicted target genes of chemical 10129
		ID	Name	Source	pValue	FDR B&H	FDR B&Y	Bonferroni	Genes from Input	Genes in Annotation
	1	C0030193	Pain	DisGeNET BeFree	4.804e-38	3.861e-34	3.695e-33	3.861e-34	79	1480
	2	C0007222	Cardiovascular Diseases	DisGeNET BeFree	3.192e-31	1.283e-27	1.227e-26	2.565e-27	73	1551
	3	C0020456	Hyperglycemia	DisGeNET BeFree	1.539e-30	4.122e-27	3.945e-26	1.237e-26	61	1052
	4	C0023418	leukemia	DisGeNET BeFree	5.917e-30	1.189e-26	1.138e-25	4.755e-26	80	1984
	5	C0027051	Myocardial Infarction	DisGeNET BeFree	8.082e-30	1.299e-26	1.243e-25	6.496e-26	72	1582
	6	C0011570	Mental Depression	DisGeNET BeFree	2.283e-29	3.057e-26	2.926e-25	1.834e-25	68	1416
	7	C3539878	Triple Negative Breast Neoplasms	DisGeNET BeFree	4.046e-29	4.645e-26	4.445e-25	3.252e-25	73	1673
	8	C0424295	Hyperactive behavior	DisGeNET BeFree	5.078e-29	5.101e-26	4.881e-25	4.081e-25	61	1121
	9	C4722518	Triple-Negative Breast Carcinoma	DisGeNET BeFree	1.044e-28	9.323e-26	8.921e-25	8.391e-25	71	1598
	10	C0036690	Septicemia	DisGeNET BeFree	1.738e-28	1.397e-25	1.337e-24	1.397e-24	64	1279
	11	C0027796	Neuralgia	DisGeNET BeFree	2.296e-28	1.677e-25	1.605e-24	1.845e-24	51	755
	12	C0524851	Neurodegenerative Disorders	DisGeNET BeFree	3.193e-28	2.094e-25	2.004e-24	2.566e-24	68	1480
	13	C0243026	Sepsis	DisGeNET BeFree	3.387e-28	2.094e-25	2.004e-24	2.722e-24	65	1340
	14	C0344315	Depressed mood	DisGeNET BeFree	9.452e-28	5.39e-25	5.158e-24	7.597e-24	67	1459
	15	C0020538	Hypertensive disease	DisGeNET BeFree	1.006e-27	5.39e-25	5.158e-24	8.085e-24	77	1973
	16	C0011581	Depressive disorder	DisGeNET BeFree	2.018e-27	1.014e-24	9.7e-24	1.622e-23	66	1430
	17	C0014544	Epilepsy	DisGeNET BeFree	3.525e-27	1.666e-24	1.595e-23	2.833e-23	59	1124
	18	C0010054	Coronary Arteriosclerosis	DisGeNET BeFree	3.084e-26	1.377e-23	1.318e-22	2.479e-22	61	1262
	19	C0033860	Psoriasis	DisGeNET BeFree	8.108e-26	3.43e-23	3.282e-22	6.517e-22	57	1105
	20	C1956346	Coronary Artery Disease	DisGeNET BeFree	2.319e-25	9.317e-23	8.916e-22	1.863e-21	65	1504
	21	C0338656	Impaired cognition	DisGeNET BeFree	3.432e-25	1.313e-22	1.257e-21	2.758e-21	62	1368
	22	C0026764	Multiple Myeloma	DisGeNET BeFree	4.355e-25	1.591e-22	1.522e-21	3.5e-21	68	1674
	23	C0004364	Autoimmune Diseases	DisGeNET BeFree	5.174e-25	1.808e-22	1.73e-21	4.158e-21	68	1679
	24	C0030567	Parkinson Disease	DisGeNET BeFree	6.044e-25	2.024e-22	1.937e-21	4.857e-21	73	1952
	25	C0011881	Diabetic Nephropathy	DisGeNET BeFree	7e-25	2.25e-22	2.153e-21	5.626e-21	56	1109
	26	C0021390	Inflammatory Bowel Diseases	DisGeNET BeFree	7.567e-25	2.339e-22	2.238e-21	6.082e-21	63	1437
	27	C0233794	Memory impairment	DisGeNET BeFree	1.793e-24	5.338e-22	5.108e-21	1.441e-20	44	648
	28	C0003850	Arteriosclerosis	DisGeNET BeFree	2.281e-24	6.549e-22	6.266e-21	1.834e-20	73	1995
	29	C0042769	Virus Diseases	DisGeNET BeFree	2.487e-24	6.696e-22	6.408e-21	1.999e-20	63	1469
	30	C0004153	Atherosclerosis	DisGeNET BeFree	2.5e-24	6.696e-22	6.408e-21	2.009e-20	73	1998
	31	C0024117	Chronic Obstructive Airway Disease	DisGeNET BeFree	8.535e-24	2.213e-21	2.117e-20	6.86e-20	57	1213
	32	C0010346	Crohn Disease	DisGeNET BeFree	1.46e-23	3.667e-21	3.509e-20	1.173e-19	56	1180
	33	C0004096	Asthma	DisGeNET BeFree	1.707e-23	4.158e-21	3.979e-20	1.372e-19	67	1731
	34	C2711227	Steatohepatitis	DisGeNET BeFree	2.036e-23	4.813e-21	4.605e-20	1.636e-19	53	1053
	35	C0151744	Myocardial Ischemia	DisGeNET BeFree	2.602e-23	5.976e-21	5.718e-20	2.092e-19	41	585
	36	C0020179	Huntington Disease	DisGeNET BeFree	5.378e-23	1.201e-20	1.149e-19	4.322e-19	50	945
	37	C0032285	Pneumonia	DisGeNET BeFree	6.811e-23	1.48e-20	1.416e-19	5.474e-19	49	908
	38	C0598766	Leukemogenesis	DisGeNET BeFree	7.831e-23	1.656e-20	1.585e-19	6.294e-19	51	996
	39	C0085281	Addictive Behavior	DisGeNET BeFree	1.629e-22	3.356e-20	3.212e-19	1.309e-18	32	330
	40	C0948008	Ischemic stroke	DisGeNET BeFree	1.813e-22	3.643e-20	3.486e-19	1.457e-18	53	1104
	41	C0022658	Kidney Diseases	DisGeNET BeFree	1.886e-22	3.644e-20	3.487e-19	1.516e-18	52	1060
	42	C0400966	Non-alcoholic Fatty Liver Disease	DisGeNET BeFree	1.904e-22	3.644e-20	3.487e-19	1.53e-18	51	1016
	43	C0036421	Systemic Scleroderma	DisGeNET BeFree	4.088e-22	7.641e-20	7.312e-19	3.286e-18	48	904
	44	C0026769	Multiple Sclerosis	DisGeNET BeFree	1.271e-21	2.321e-19	2.221e-18	1.021e-17	62	1599
	45	C3203102	Idiopathic pulmonary arterial hypertension	DisGeNET BeFree	2.042e-21	3.646e-19	3.489e-18	1.641e-17	42	695
	46	C0239946	Fibrosis, Liver	DisGeNET BeFree	2.325e-21	4.062e-19	3.887e-18	1.868e-17	51	1075
	47	C0524620	Metabolic Syndrome X	DisGeNET BeFree	3.222e-21	5.51e-19	5.272e-18	2.59e-17	51	1083
	48	C1332977	Childhood Leukemia	DisGeNET BeFree	3.636e-21	6.026e-19	5.766e-18	2.922e-17	64	1740
	49	C0024141	Lupus Erythematosus, Systemic	DisGeNET BeFree	3.674e-21	6.026e-19	5.766e-18	2.953e-17	63	1686
	50	C0041296	Tuberculosis	DisGeNET BeFree	3.993e-21	6.418e-19	6.142e-18	3.209e-17	54	1229

## Sheet: 8842 
	ToppFun identified abnormalities associated with predicted target genes of chemical 8842
		ID	Name	Source	pValue	FDR B&H	FDR B&Y	Bonferroni	Genes from Input	Genes in Annotation
	1	C0030193	Pain	DisGeNET BeFree	1.769e-28	1.015e-24	9.376e-24	1.015e-24	56	1480
	2	C0524851	Neurodegenerative Disorders	DisGeNET BeFree	8.724e-24	2.505e-20	2.313e-19	5.01e-20	51	1480
	3	C0027796	Neuralgia	DisGeNET BeFree	5.051e-23	9.669e-20	8.927e-19	2.901e-19	38	755
	4	C0024117	Chronic Obstructive Airway Disease	DisGeNET BeFree	4.925e-22	7.07e-19	6.528e-18	2.828e-18	45	1213
	5	C0030567	Parkinson Disease	DisGeNET BeFree	1.174e-21	1.348e-18	1.244e-17	6.739e-18	55	1952
	6	C0003850	Arteriosclerosis	DisGeNET BeFree	3.292e-21	2.825e-18	2.608e-17	1.89e-17	55	1995
	7	C0004153	Atherosclerosis	DisGeNET BeFree	3.534e-21	2.825e-18	2.608e-17	2.029e-17	55	1998
	8	C0007222	Cardiovascular Diseases	DisGeNET BeFree	3.936e-21	2.825e-18	2.608e-17	2.26e-17	49	1551
	9	C0020456	Hyperglycemia	DisGeNET BeFree	9.478e-21	6.047e-18	5.583e-17	5.442e-17	41	1052
	10	C0020538	Hypertensive disease	DisGeNET BeFree	1.264e-20	7.26e-18	6.703e-17	7.26e-17	54	1973
	11	C0023418	leukemia	DisGeNET BeFree	1.021e-19	5.33e-17	4.921e-16	5.863e-16	53	1984
	12	C0004364	Autoimmune Diseases	DisGeNET BeFree	1.142e-19	5.462e-17	5.043e-16	6.555e-16	49	1679
	13	C0002736	Amyotrophic Lateral Sclerosis	DisGeNET BeFree	1.369e-19	6.048e-17	5.584e-16	7.863e-16	40	1069
	14	C0034069	Pulmonary Fibrosis	DisGeNET BeFree	3.284e-19	1.347e-16	1.243e-15	1.885e-15	36	856
	15	C3539878	Triple Negative Breast Neoplasms	DisGeNET BeFree	6.324e-19	2.326e-16	2.148e-15	3.631e-15	48	1673
	16	C0026764	Multiple Myeloma	DisGeNET BeFree	6.481e-19	2.326e-16	2.148e-15	3.722e-15	48	1674
	17	C0239946	Fibrosis, Liver	DisGeNET BeFree	1.284e-18	4.338e-16	4.005e-15	7.374e-15	39	1075
	18	C0011570	Mental Depression	DisGeNET BeFree	1.55e-18	4.945e-16	4.565e-15	8.9e-15	44	1416
	19	C0009241	Cognition Disorders	DisGeNET BeFree	2.223e-18	6.465e-16	5.969e-15	1.277e-14	30	584
	20	C0011581	Depressive disorder	DisGeNET BeFree	2.252e-18	6.465e-16	5.969e-15	1.293e-14	44	1430
	21	C0027051	Myocardial Infarction	DisGeNET BeFree	2.675e-18	7.315e-16	6.754e-15	1.536e-14	46	1582
	22	C0948008	Ischemic stroke	DisGeNET BeFree	3.206e-18	8.368e-16	7.726e-15	1.841e-14	39	1104
	23	C0344315	Depressed mood	DisGeNET BeFree	4.814e-18	1.202e-15	1.11e-14	2.764e-14	44	1459
	24	C0014544	Epilepsy	DisGeNET BeFree	5.927e-18	1.418e-15	1.309e-14	3.404e-14	39	1124
	25	C0029408	Degenerative polyarthritis	DisGeNET BeFree	6.481e-18	1.489e-15	1.374e-14	3.722e-14	47	1694
	26	C1332977	Childhood Leukemia	DisGeNET BeFree	1.877e-17	4.144e-15	3.826e-14	1.078e-13	47	1740
	27	C0038454	Cerebrovascular accident	DisGeNET BeFree	1.984e-17	4.22e-15	3.897e-14	1.139e-13	44	1515
	28	C4722518	Triple-Negative Breast Carcinoma	DisGeNET BeFree	2.437e-17	4.997e-15	4.613e-14	1.399e-13	45	1598
	29	C0233794	Memory impairment	DisGeNET BeFree	3.894e-17	7.71e-15	7.118e-14	2.236e-13	30	648
	30	C0476089	Endometrial Carcinoma	DisGeNET BeFree	5.251e-17	1.005e-14	9.28e-14	3.015e-13	44	1555
	31	C0856169	Endothelial dysfunction	DisGeNET BeFree	6.969e-17	1.291e-14	1.192e-13	4.001e-13	31	716
	32	C0004096	Asthma	DisGeNET BeFree	8.871e-17	1.592e-14	1.47e-13	5.094e-13	46	1731
	33	C0549473	Thyroid carcinoma	DisGeNET BeFree	9.421e-17	1.639e-14	1.514e-13	5.41e-13	38	1152
	34	C0338656	Impaired cognition	DisGeNET BeFree	1.181e-16	1.959e-14	1.809e-13	6.779e-13	41	1368
	35	C0009319	Colitis	DisGeNET BeFree	1.194e-16	1.959e-14	1.809e-13	6.856e-13	37	1094
	36	C0014175	Endometriosis	DisGeNET BeFree	1.26e-16	2.01e-14	1.855e-13	7.235e-13	36	1031
	37	C0011881	Diabetic Nephropathy	DisGeNET BeFree	1.849e-16	2.87e-14	2.65e-13	1.062e-12	37	1109
	38	C0018801	Heart failure	DisGeNET BeFree	2.113e-16	3.192e-14	2.948e-13	1.213e-12	41	1391
	39	C0042769	Virus Diseases	DisGeNET BeFree	2.381e-16	3.505e-14	3.236e-13	1.367e-12	42	1469
	40	C1096063	Drug Resistant Epilepsy	DisGeNET BeFree	3.243e-16	4.655e-14	4.298e-13	1.862e-12	18	182
	41	C0036690	Septicemia	DisGeNET BeFree	4.629e-16	6.482e-14	5.985e-13	2.658e-12	39	1279
	42	C0018802	Congestive heart failure	DisGeNET BeFree	4.918e-16	6.724e-14	6.208e-13	2.824e-12	43	1575
	43	C0151650	Renal fibrosis	DisGeNET BeFree	6.244e-16	8.338e-14	7.699e-13	3.585e-12	27	558
	44	C0007103	Malignant neoplasm of endometrium	DisGeNET BeFree	8.238e-16	1.075e-13	9.926e-13	4.731e-12	38	1231
	45	C0026769	Multiple Sclerosis	DisGeNET BeFree	8.47e-16	1.081e-13	9.979e-13	4.864e-12	43	1599
	46	C0024299	Lymphoma	DisGeNET BeFree	1.13e-15	1.411e-13	1.303e-12	6.491e-12	41	1460
	47	C0041956	Ureteral obstruction	DisGeNET BeFree	1.24e-15	1.515e-13	1.399e-12	7.12e-12	22	342
	48	C0010346	Crohn Disease	DisGeNET BeFree	1.337e-15	1.599e-13	1.476e-12	7.675e-12	37	1180
	49	C0003864	Arthritis	DisGeNET BeFree	1.866e-15	2.187e-13	2.019e-12	1.071e-11	34	992
	50	C2931822	Nasopharyngeal carcinoma	DisGeNET BeFree	1.98e-15	2.274e-13	2.1e-12	1.137e-11	41	1484

## Sheet: 5280435
	ToppFun identified abnormalities associated with predicted target genes of chemical 5280435
		ID	Name	Source	pValue	FDR B&H	FDR B&Y	Bonferroni	Genes from Input	Genes in Annotation
	1	C0030193	Pain	DisGeNET BeFree	1.883e-35	1.24e-31	1.162e-30	1.24e-31	64	1480
	2	C0027796	Neuralgia	DisGeNET BeFree	8.351e-30	2.75e-26	2.577e-25	5.501e-26	45	755
	3	C0020456	Hyperglycemia	DisGeNET BeFree	1.039e-26	2.281e-23	2.137e-22	6.843e-23	48	1052
	4	C0030567	Parkinson Disease	DisGeNET BeFree	9.529e-26	1.569e-22	1.47e-21	6.276e-22	61	1952
	5	C0014544	Epilepsy	DisGeNET BeFree	1.906e-25	2.511e-22	2.353e-21	1.256e-21	48	1124
	6	C3539878	Triple Negative Breast Neoplasms	DisGeNET BeFree	6.362e-24	6.984e-21	6.545e-20	4.191e-20	55	1673
	7	C0027051	Myocardial Infarction	DisGeNET BeFree	2.477e-23	2.331e-20	2.184e-19	1.631e-19	53	1582
	8	C0009319	Colitis	DisGeNET BeFree	4.396e-23	3.62e-20	3.392e-19	2.896e-19	45	1094
	9	C0003864	Arthritis	DisGeNET BeFree	6.952e-23	5.088e-20	4.767e-19	4.579e-19	43	992
	10	C0004096	Asthma	DisGeNET BeFree	2.327e-22	1.533e-19	1.436e-18	1.533e-18	54	1731
	11	C4722518	Triple-Negative Breast Carcinoma	DisGeNET BeFree	2.874e-22	1.721e-19	1.613e-18	1.893e-18	52	1598
	12	C0026764	Multiple Myeloma	DisGeNET BeFree	3.415e-22	1.811e-19	1.697e-18	2.249e-18	53	1674
	13	C0024117	Chronic Obstructive Airway Disease	DisGeNET BeFree	3.574e-22	1.811e-19	1.697e-18	2.354e-18	46	1213
	14	C0524851	Neurodegenerative Disorders	DisGeNET BeFree	4.876e-22	2.294e-19	2.15e-18	3.212e-18	50	1480
	15	C0007222	Cardiovascular Diseases	DisGeNET BeFree	5.361e-22	2.354e-19	2.206e-18	3.531e-18	51	1551
	16	C0023895	Liver diseases	DisGeNET BeFree	1.103e-21	4.542e-19	4.256e-18	7.268e-18	41	951
	17	C0239946	Fibrosis, Liver	DisGeNET BeFree	1.57e-21	6.082e-19	5.699e-18	1.034e-17	43	1075
	18	C0023418	leukemia	DisGeNET BeFree	3.404e-21	1.246e-18	1.167e-17	2.242e-17	56	1984
	19	C0948008	Ischemic stroke	DisGeNET BeFree	4.368e-21	1.427e-18	1.337e-17	2.877e-17	43	1104
	20	C0003850	Arteriosclerosis	DisGeNET BeFree	4.435e-21	1.427e-18	1.337e-17	2.921e-17	56	1995
	21	C0041296	Tuberculosis	DisGeNET BeFree	4.737e-21	1.427e-18	1.337e-17	3.121e-17	45	1229
	22	C0004153	Atherosclerosis	DisGeNET BeFree	4.765e-21	1.427e-18	1.337e-17	3.139e-17	56	1998
	23	C0041956	Ureteral obstruction	DisGeNET BeFree	6.69e-21	1.916e-18	1.795e-17	4.407e-17	27	342
	24	C0020538	Hypertensive disease	DisGeNET BeFree	1.639e-20	4.498e-18	4.214e-17	1.079e-16	55	1973
	25	C0014070	Encephalomyelitis	DisGeNET BeFree	2.415e-20	6.362e-18	5.961e-17	1.59e-16	38	864
	26	C2931822	Nasopharyngeal carcinoma	DisGeNET BeFree	2.733e-20	6.924e-18	6.488e-17	1.8e-16	48	1484
	27	C0476089	Endometrial Carcinoma	DisGeNET BeFree	2.877e-20	7.018e-18	6.576e-17	1.895e-16	49	1555
	28	C1332206	Adult Lymphoma	DisGeNET BeFree	3.878e-20	9.123e-18	8.549e-17	2.555e-16	43	1169
	29	C1332979	Childhood Lymphoma	DisGeNET BeFree	4.138e-20	9.4e-18	8.807e-17	2.726e-16	43	1171
	30	C0002736	Amyotrophic Lateral Sclerosis	DisGeNET BeFree	8.123e-20	1.784e-17	1.671e-16	5.351e-16	41	1069
	31	C0026769	Multiple Sclerosis	DisGeNET BeFree	9.347e-20	1.95e-17	1.828e-16	6.157e-16	49	1599
	32	C0024299	Lymphoma	DisGeNET BeFree	9.475e-20	1.95e-17	1.828e-16	6.241e-16	47	1460
	33	C0677936	Refractory cancer	DisGeNET BeFree	1e-19	1.996e-17	1.871e-16	6.588e-16	21	184
	34	C0004364	Autoimmune Diseases	DisGeNET BeFree	1.156e-19	2.203e-17	2.064e-16	7.614e-16	50	1679
	35	C0024121	Lung Neoplasms	DisGeNET BeFree	1.17e-19	2.203e-17	2.064e-16	7.709e-16	40	1020
	36	C3203102	Idiopathic pulmonary arterial hypertension	DisGeNET BeFree	1.334e-19	2.441e-17	2.287e-16	8.786e-16	34	695
	37	C0243026	Sepsis	DisGeNET BeFree	1.441e-19	2.565e-17	2.403e-16	9.49e-16	45	1340
	38	C0036690	Septicemia	DisGeNET BeFree	1.653e-19	2.865e-17	2.684e-16	1.089e-15	44	1279
	39	C0014175	Endometriosis	DisGeNET BeFree	1.714e-19	2.895e-17	2.712e-16	1.129e-15	40	1031
	40	C0033860	Psoriasis	DisGeNET BeFree	2.701e-19	4.392e-17	4.115e-16	1.779e-15	41	1105
	41	C0007103	Malignant neoplasm of endometrium	DisGeNET BeFree	2.734e-19	4.392e-17	4.115e-16	1.801e-15	43	1231
	42	C0018802	Congestive heart failure	DisGeNET BeFree	3.21e-19	5.034e-17	4.717e-16	2.114e-15	48	1575
	43	C0021390	Inflammatory Bowel Diseases	DisGeNET BeFree	3.345e-19	5.124e-17	4.801e-16	2.203e-15	46	1437
	44	C0278488	Carcinoma breast stage IV	DisGeNET BeFree	4.008e-19	6e-17	5.622e-16	2.64e-15	31	573
	45	C1332977	Childhood Leukemia	DisGeNET BeFree	5.287e-19	7.739e-17	7.251e-16	3.482e-15	50	1740
	46	C0598935	Tumor Initiation	DisGeNET BeFree	5.422e-19	7.764e-17	7.275e-16	3.571e-15	30	533
	47	C1800706	Idiopathic Pulmonary Fibrosis	DisGeNET BeFree	7.009e-19	9.823e-17	9.205e-16	4.617e-15	35	786
	48	C0280100	Solid Neoplasm	DisGeNET BeFree	9.433e-19	1.294e-16	1.213e-15	6.213e-15	41	1144
	49	C0015695	Fatty Liver	DisGeNET BeFree	1.878e-18	2.525e-16	2.366e-15	1.237e-14	34	757
	50	C0740391	Middle Cerebral Artery Occlusion	DisGeNET BeFree	2.088e-18	2.75e-16	2.577e-15	1.375e-14	31	607

## Sheet: 12739614
	ToppFun identified abnormalities associated with predicted target genes of chemical 12739614
		ID	Name	Source	pValue	FDR B&H	FDR B&Y	Bonferroni	Genes from Input	Genes in Annotation
	1	C0030193	Pain	DisGeNET BeFree	6.212e-29	4.453e-25	4.21e-24	4.453e-25	66	1480
	2	C0007222	Cardiovascular Diseases	DisGeNET BeFree	1.319e-28	4.73e-25	4.472e-24	9.459e-25	67	1551
	3	C0027051	Myocardial Infarction	DisGeNET BeFree	2.963e-27	7.081e-24	6.695e-23	2.124e-23	66	1582
	4	C0003850	Arteriosclerosis	DisGeNET BeFree	2.296e-25	3.604e-22	3.408e-21	1.646e-21	71	1995
	5	C0004153	Atherosclerosis	DisGeNET BeFree	2.514e-25	3.604e-22	3.408e-21	1.802e-21	71	1998
	6	C3539878	Triple Negative Breast Neoplasms	DisGeNET BeFree	2.93e-24	3.501e-21	3.31e-20	2.101e-20	64	1673
	7	C0036690	Septicemia	DisGeNET BeFree	8.603e-24	8.537e-21	8.072e-20	6.168e-20	56	1279
	8	C4722518	Triple-Negative Breast Carcinoma	DisGeNET BeFree	9.527e-24	8.537e-21	8.072e-20	6.83e-20	62	1598
	9	C0243026	Sepsis	DisGeNET BeFree	1.26e-23	1.004e-20	9.491e-20	9.034e-20	57	1340
	10	C0020456	Hyperglycemia	DisGeNET BeFree	1.596e-23	1.145e-20	1.082e-19	1.145e-19	51	1052
	11	C0011570	Mental Depression	DisGeNET BeFree	2.991e-23	1.949e-20	1.843e-19	2.144e-19	58	1416
	12	C0524851	Neurodegenerative Disorders	DisGeNET BeFree	4.349e-23	2.598e-20	2.456e-19	3.118e-19	59	1480
	13	C0011581	Depressive disorder	DisGeNET BeFree	3.056e-22	1.685e-19	1.593e-18	2.191e-18	57	1430
	14	C0344315	Depressed mood	DisGeNET BeFree	8.104e-22	4.15e-19	3.923e-18	5.81e-18	57	1459
	15	C0030567	Parkinson Disease	DisGeNET BeFree	2.172e-21	1.038e-18	9.815e-18	1.557e-17	65	1952
	16	C0020538	Hypertensive disease	DisGeNET BeFree	3.853e-21	1.727e-18	1.632e-17	2.762e-17	65	1973
	17	C0024117	Chronic Obstructive Airway Disease	DisGeNET BeFree	8.966e-21	3.781e-18	3.575e-17	6.428e-17	51	1213
	18	C0027796	Neuralgia	DisGeNET BeFree	1.356e-20	5.196e-18	4.913e-17	9.718e-17	41	755
	19	C0014544	Epilepsy	DisGeNET BeFree	1.377e-20	5.196e-18	4.913e-17	9.873e-17	49	1124
	20	C0018802	Congestive heart failure	DisGeNET BeFree	3.189e-20	1.143e-17	1.081e-16	2.286e-16	57	1575
	21	C0338656	Impaired cognition	DisGeNET BeFree	5.002e-20	1.646e-17	1.556e-16	3.586e-16	53	1368
	22	C0011881	Diabetic Nephropathy	DisGeNET BeFree	5.05e-20	1.646e-17	1.556e-16	3.62e-16	48	1109
	23	C0424295	Hyperactive behavior	DisGeNET BeFree	7.875e-20	2.455e-17	2.321e-16	5.646e-16	48	1121
	24	C0004364	Autoimmune Diseases	DisGeNET BeFree	1.243e-19	3.712e-17	3.51e-16	8.91e-16	58	1679
	25	C0001973	Alcoholic Intoxication, Chronic	DisGeNET BeFree	5.939e-19	1.618e-16	1.53e-15	4.258e-15	32	471
	26	C0018801	Heart failure	DisGeNET BeFree	5.944e-19	1.618e-16	1.53e-15	4.262e-15	52	1391
	27	C0019196	Hepatitis C	DisGeNET BeFree	6.094e-19	1.618e-16	1.53e-15	4.369e-15	58	1736
	28	C0029408	Degenerative polyarthritis	DisGeNET BeFree	9.84e-19	2.519e-16	2.382e-15	7.054e-15	57	1694
	29	C0007785	Cerebral Infarction	DisGeNET BeFree	1.059e-18	2.547e-16	2.409e-15	7.594e-15	37	676
	30	C0020179	Huntington Disease	DisGeNET BeFree	1.066e-18	2.547e-16	2.409e-15	7.642e-15	43	945
	31	C0036572	Seizures	DisGeNET BeFree	1.529e-18	3.536e-16	3.343e-15	1.096e-14	45	1052
	32	C0233794	Memory impairment	DisGeNET BeFree	2.069e-18	4.636e-16	4.383e-15	1.484e-14	36	648
	33	C0021390	Inflammatory Bowel Diseases	DisGeNET BeFree	2.428e-18	5.275e-16	4.988e-15	1.741e-14	52	1437
	34	C0004096	Asthma	DisGeNET BeFree	2.685e-18	5.661e-16	5.353e-15	1.925e-14	57	1731
	35	C1956346	Coronary Artery Disease	DisGeNET BeFree	3.299e-18	6.758e-16	6.39e-15	2.365e-14	53	1504
	36	C0085281	Addictive Behavior	DisGeNET BeFree	3.935e-18	7.835e-16	7.408e-15	2.821e-14	27	330
	37	C0042769	Virus Diseases	DisGeNET BeFree	6.253e-18	1.211e-15	1.145e-14	4.482e-14	52	1469
	38	C0032285	Pneumonia	DisGeNET BeFree	1.051e-17	1.983e-15	1.875e-14	7.535e-14	41	908
	39	C0239946	Fibrosis, Liver	DisGeNET BeFree	2.09e-17	3.842e-15	3.633e-14	1.499e-13	44	1075
	40	C0010346	Crohn Disease	DisGeNET BeFree	2.164e-17	3.878e-15	3.667e-14	1.551e-13	46	1180
	41	C0856169	Endothelial dysfunction	DisGeNET BeFree	5.008e-17	8.757e-15	8.28e-14	3.59e-13	36	716
	42	C0010054	Coronary Arteriosclerosis	DisGeNET BeFree	5.316e-17	9.074e-15	8.579e-14	3.811e-13	47	1262
	43	C2711227	Steatohepatitis	DisGeNET BeFree	5.708e-17	9.457e-15	8.941e-14	4.092e-13	43	1053
	44	C0033860	Psoriasis	DisGeNET BeFree	5.804e-17	9.457e-15	8.941e-14	4.161e-13	44	1105
	45	C0022658	Kidney Diseases	DisGeNET BeFree	7.26e-17	1.157e-14	1.093e-13	5.204e-13	43	1060
	46	C0948008	Ischemic stroke	DisGeNET BeFree	3.149e-16	4.908e-14	4.64e-13	2.258e-12	43	1104
	47	C0038454	Cerebrovascular accident	DisGeNET BeFree	5.65e-16	8.618e-14	8.148e-13	4.051e-12	50	1515
	48	C0151650	Renal fibrosis	DisGeNET BeFree	6.461e-16	9.65e-14	9.124e-13	4.632e-12	31	558
	49	C0740391	Middle Cerebral Artery Occlusion	DisGeNET BeFree	9.174e-16	1.342e-13	1.269e-12	6.577e-12	32	607
	50	C0036341	Schizophrenia	DisGeNET Curated	9.75e-16	1.398e-13	1.322e-12	6.989e-12	38	883

## Sheet: 87520016
	ToppFun identified abnormalities associated with predicted target genes of chemical 87520016
		ID	Name	Source	pValue	FDR B&H	FDR B&Y	Bonferroni	Genes from Input	Genes in Annotation
	1	C0524851	Neurodegenerative Disorders	DisGeNET BeFree	5.652e-19	3.138e-15	2.887e-14	3.138e-15	37	1480
	2	C3539878	Triple Negative Breast Neoplasms	DisGeNET BeFree	3.252e-17	7.527e-14	6.924e-13	1.805e-13	37	1673
	3	C0030193	Pain	DisGeNET BeFree	4.222e-17	7.527e-14	6.924e-13	2.344e-13	35	1480
	4	C4722518	Triple-Negative Breast Carcinoma	DisGeNET BeFree	5.856e-17	7.527e-14	6.924e-13	3.251e-13	36	1598
	5	C0024117	Chronic Obstructive Airway Disease	DisGeNET BeFree	6.779e-17	7.527e-14	6.924e-13	3.764e-13	32	1213
	6	C0011570	Mental Depression	DisGeNET BeFree	7.218e-16	6.679e-13	6.145e-12	4.008e-12	33	1416
	7	C0011581	Depressive disorder	DisGeNET BeFree	9.618e-16	7.628e-13	7.017e-12	5.34e-12	33	1430
	8	C0344315	Depressed mood	DisGeNET BeFree	1.725e-15	1.197e-12	1.101e-11	9.576e-12	33	1459
	9	C0338656	Impaired cognition	DisGeNET BeFree	2.098e-15	1.294e-12	1.19e-11	1.165e-11	32	1368
	10	C0424295	Hyperactive behavior	DisGeNET BeFree	4.981e-15	2.694e-12	2.478e-11	2.765e-11	29	1121
	11	C0014544	Epilepsy	DisGeNET BeFree	5.337e-15	2.694e-12	2.478e-11	2.963e-11	29	1124
	12	C0007222	Cardiovascular Diseases	DisGeNET BeFree	1.009e-14	4.669e-12	4.295e-11	5.603e-11	33	1551
	13	C0027051	Myocardial Infarction	DisGeNET BeFree	1.78e-14	7.602e-12	6.993e-11	9.882e-11	33	1582
	14	C0020538	Hypertensive disease	DisGeNET BeFree	4.274e-14	1.695e-11	1.559e-10	2.373e-10	36	1973
	15	C0024115	Lung diseases	DisGeNET BeFree	5.178e-14	1.917e-11	1.763e-10	2.875e-10	22	630
	16	C0280100	Solid Neoplasm	DisGeNET BeFree	6.676e-14	2.317e-11	2.131e-10	3.706e-10	28	1144
	17	C0376618	Endotoxemia	DisGeNET BeFree	1.275e-13	4.164e-11	3.831e-10	7.079e-10	17	332
	18	C0149925	Small cell carcinoma of lung	DisGeNET BeFree	1.946e-13	6.001e-11	5.521e-10	1.08e-09	25	918
	19	C0476089	Endometrial Carcinoma	DisGeNET BeFree	4.972e-13	1.453e-10	1.337e-09	2.761e-09	31	1555
	20	C0018802	Congestive heart failure	DisGeNET BeFree	6.975e-13	1.936e-10	1.781e-09	3.873e-09	31	1575
	21	C0009319	Colitis	DisGeNET BeFree	1.303e-12	3.446e-10	3.17e-09	7.237e-09	26	1094
	22	C0085281	Addictive Behavior	DisGeNET BeFree	1.658e-12	4.185e-10	3.85e-09	9.208e-09	16	330
	23	C0027796	Neuralgia	DisGeNET BeFree	1.941e-12	4.684e-10	4.309e-09	1.077e-08	22	755
	24	C0001430	Adenoma	DisGeNET BeFree	2.508e-12	5.801e-10	5.336e-09	1.392e-08	26	1126
	25	C0034067	Pulmonary Emphysema	DisGeNET BeFree	3.401e-12	7.523e-10	6.92e-09	1.888e-08	16	346
	26	C0014070	Encephalomyelitis	DisGeNET BeFree	3.523e-12	7.523e-10	6.92e-09	1.956e-08	23	864
	27	C0020456	Hyperglycemia	DisGeNET BeFree	3.947e-12	8.117e-10	7.467e-09	2.191e-08	25	1052
	28	C4048328	cervical cancer	DisGeNET BeFree	4.605e-12	9.131e-10	8.399e-09	2.557e-08	32	1809
	29	C0002736	Amyotrophic Lateral Sclerosis	DisGeNET BeFree	5.599e-12	1.072e-09	9.86e-09	3.108e-08	25	1069
	30	C0236734	Caffeine related disorders	DisGeNET BeFree	6.19e-12	1.146e-09	1.054e-08	3.437e-08	16	360
	31	C0018801	Heart failure	DisGeNET BeFree	7.705e-12	1.38e-09	1.269e-08	4.278e-08	28	1391
	32	C0019196	Hepatitis C	DisGeNET BeFree	8.908e-12	1.546e-09	1.422e-08	4.946e-08	31	1736
	33	C0007682	CNS disorder	DisGeNET BeFree	1.041e-11	1.723e-09	1.585e-08	5.777e-08	15	313
	34	C0040517	Gilles de la Tourette syndrome	DisGeNET BeFree	1.057e-11	1.723e-09	1.585e-08	5.869e-08	12	164
	35	C0041696	Unipolar Depression	DisGeNET Curated	1.086e-11	1.723e-09	1.585e-08	6.029e-08	14	259
	36	C0302592	Cervix carcinoma	DisGeNET BeFree	1.162e-11	1.792e-09	1.648e-08	6.451e-08	32	1873
	37	C0009241	Cognition Disorders	DisGeNET BeFree	1.215e-11	1.823e-09	1.677e-08	6.744e-08	19	584
	38	C0400966	Non-alcoholic Fatty Liver Disease	DisGeNET BeFree	1.338e-11	1.955e-09	1.799e-08	7.431e-08	24	1016
	39	C0024121	Lung Neoplasms	DisGeNET BeFree	1.453e-11	2.068e-09	1.903e-08	8.066e-08	24	1020
	40	C0034069	Pulmonary Fibrosis	DisGeNET BeFree	2.266e-11	3.146e-09	2.894e-08	1.258e-07	22	856
	41	C1269683	Major Depressive Disorder	DisGeNET BeFree	2.537e-11	3.435e-09	3.16e-08	1.408e-07	22	861
	42	C2711227	Steatohepatitis	DisGeNET BeFree	2.82e-11	3.727e-09	3.429e-08	1.565e-07	24	1053
	43	C0010054	Coronary Arteriosclerosis	DisGeNET BeFree	3.221e-11	4.08e-09	3.753e-08	1.788e-07	26	1262
	44	C0022658	Kidney Diseases	DisGeNET BeFree	3.235e-11	4.08e-09	3.753e-08	1.796e-07	24	1060
	45	C0001973	Alcoholic Intoxication, Chronic	DisGeNET BeFree	3.382e-11	4.08e-09	3.753e-08	1.878e-07	17	471
	46	C1800706	Idiopathic Pulmonary Fibrosis	DisGeNET BeFree	3.44e-11	4.08e-09	3.753e-08	1.91e-07	21	786
	47	C0030567	Parkinson Disease	DisGeNET BeFree	3.454e-11	4.08e-09	3.753e-08	1.917e-07	32	1952
	48	C0041956	Ureteral obstruction	DisGeNET BeFree	3.649e-11	4.22e-09	3.882e-08	2.026e-07	15	342
	49	C0007134	Renal Cell Carcinoma	DisGeNET BeFree	3.743e-11	4.241e-09	3.902e-08	2.078e-07	32	1958
	50	C0007847	Malignant tumor of cervix	DisGeNET BeFree	3.83e-11	4.253e-09	3.912e-08	2.126e-07	30	1718

## Sheet: 8379
	ToppFun identified abnormalities associated with predicted target genes of chemical 8379
		ID	Name	Source	pValue	FDR B&H	FDR B&Y	Bonferroni	Genes from Input	Genes in Annotation
	1	C0524851	Neurodegenerative Disorders	DisGeNET BeFree	6.451e-19	3.261e-15	2.97e-14	3.261e-15	35	1480
	2	C0007222	Cardiovascular Diseases	DisGeNET BeFree	2.861e-18	7.232e-15	6.585e-14	1.446e-14	35	1551
	3	C0030193	Pain	DisGeNET BeFree	6.232e-18	1.05e-14	9.564e-14	3.151e-14	34	1480
	4	C0024117	Chronic Obstructive Airway Disease	DisGeNET BeFree	1.599e-17	2.021e-14	1.84e-13	8.085e-14	31	1213
	5	C0018802	Congestive heart failure	DisGeNET BeFree	4.196e-17	4.243e-14	3.863e-13	2.121e-13	34	1575
	6	C0018801	Heart failure	DisGeNET BeFree	8.394e-17	7.073e-14	6.441e-13	4.244e-13	32	1391
	7	C0011881	Diabetic Nephropathy	DisGeNET BeFree	1.364e-16	9.855e-14	8.974e-13	6.899e-13	29	1109
	8	C0004096	Asthma	DisGeNET BeFree	7.334e-16	4.635e-13	4.221e-12	3.708e-12	34	1731
	9	C0424295	Hyperactive behavior	DisGeNET BeFree	1.729e-15	8.964e-13	8.162e-12	8.741e-12	28	1121
	10	C0014544	Epilepsy	DisGeNET BeFree	1.85e-15	8.964e-13	8.162e-12	9.353e-12	28	1124
	11	C3714636	Pneumonitis	DisGeNET BeFree	1.95e-15	8.964e-13	8.162e-12	9.86e-12	23	682
	12	C0002736	Amyotrophic Lateral Sclerosis	DisGeNET BeFree	4.91e-15	2.069e-12	1.884e-11	2.482e-11	27	1069
	13	C0033860	Psoriasis	DisGeNET BeFree	1.1e-14	4.279e-12	3.897e-11	5.563e-11	27	1105
	14	C0026764	Multiple Myeloma	DisGeNET BeFree	1.63e-14	5.886e-12	5.359e-11	8.24e-11	32	1674
	15	C4048328	cervical cancer	DisGeNET BeFree	2.019e-14	6.805e-12	6.197e-11	1.021e-10	33	1809
	16	C0034069	Pulmonary Fibrosis	DisGeNET BeFree	2.487e-14	7.588e-12	6.91e-11	1.257e-10	24	856
	17	C0027051	Myocardial Infarction	DisGeNET BeFree	2.551e-14	7.588e-12	6.91e-11	1.29e-10	31	1582
	18	C0036572	Seizures	DisGeNET BeFree	3.031e-14	8.515e-12	7.753e-11	1.533e-10	26	1052
	19	C0007847	Malignant tumor of cervix	DisGeNET BeFree	3.366e-14	8.957e-12	8.156e-11	1.702e-10	32	1718
	20	C0023418	leukemia	DisGeNET BeFree	4.221e-14	1.067e-11	9.717e-11	2.134e-10	34	1984
	21	C0003850	Arteriosclerosis	DisGeNET BeFree	4.964e-14	1.192e-11	1.086e-10	2.51e-10	34	1995
	22	C0004153	Atherosclerosis	DisGeNET BeFree	5.188e-14	1.192e-11	1.086e-10	2.623e-10	34	1998
	23	C0302592	Cervix carcinoma	DisGeNET BeFree	5.464e-14	1.201e-11	1.094e-10	2.763e-10	33	1873
	24	C0151650	Renal fibrosis	DisGeNET BeFree	5.964e-14	1.256e-11	1.144e-10	3.015e-10	20	558
	25	C0011570	Mental Depression	DisGeNET BeFree	7.834e-14	1.584e-11	1.443e-10	3.961e-10	29	1416
	26	C0027796	Neuralgia	DisGeNET BeFree	1.751e-13	3.193e-11	2.907e-10	8.853e-10	22	755
	27	C0011991	Diarrhea	DisGeNET BeFree	1.763e-13	3.193e-11	2.907e-10	8.915e-10	18	446
	28	C0030567	Parkinson Disease	DisGeNET BeFree	1.768e-13	3.193e-11	2.907e-10	8.941e-10	33	1952
	29	C0042769	Virus Diseases	DisGeNET BeFree	1.994e-13	3.477e-11	3.166e-10	1.008e-09	29	1469
	30	C0023895	Liver diseases	DisGeNET BeFree	2.452e-13	4.132e-11	3.763e-10	1.24e-09	24	951
	31	C0020456	Hyperglycemia	DisGeNET BeFree	2.616e-13	4.252e-11	3.872e-10	1.323e-09	25	1052
	32	C0010054	Coronary Arteriosclerosis	DisGeNET BeFree	2.691e-13	4.252e-11	3.872e-10	1.361e-09	27	1262
	33	C0542476	Forgetful	DisGeNET BeFree	3.914e-13	5.997e-11	5.461e-10	1.979e-09	16	337
	34	C0009319	Colitis	DisGeNET BeFree	6.254e-13	9.3e-11	8.468e-10	3.162e-09	25	1094
	35	C0011581	Depressive disorder	DisGeNET BeFree	7.37e-13	1.065e-10	9.695e-10	3.726e-09	28	1430
	36	C0032285	Pneumonia	DisGeNET BeFree	8.088e-13	1.122e-10	1.022e-09	4.089e-09	23	908
	37	C1561643	Chronic Kidney Diseases	DisGeNET BeFree	8.211e-13	1.122e-10	1.022e-09	4.152e-09	24	1006
	38	C0024141	Lupus Erythematosus, Systemic	DisGeNET BeFree	9.705e-13	1.291e-10	1.176e-09	4.907e-09	30	1686
	39	C0400966	Non-alcoholic Fatty Liver Disease	DisGeNET BeFree	1.015e-12	1.315e-10	1.198e-09	5.13e-09	24	1016
	40	C0041296	Tuberculosis	DisGeNET BeFree	1.105e-12	1.374e-10	1.251e-09	5.587e-09	26	1229
	41	C0243026	Sepsis	DisGeNET BeFree	1.114e-12	1.374e-10	1.251e-09	5.634e-09	27	1340
	42	C0344315	Depressed mood	DisGeNET BeFree	1.201e-12	1.446e-10	1.317e-09	6.073e-09	28	1459
	43	C0009241	Cognition Disorders	DisGeNET BeFree	1.551e-12	1.824e-10	1.661e-09	7.842e-09	19	584
	44	C0151744	Myocardial Ischemia	DisGeNET BeFree	1.598e-12	1.836e-10	1.672e-09	8.08e-09	19	585
	45	C0027765	nervous system disorder	DisGeNET BeFree	1.725e-12	1.938e-10	1.765e-09	8.722e-09	23	942
	46	C2931822	Nasopharyngeal carcinoma	DisGeNET BeFree	1.813e-12	1.993e-10	1.815e-09	9.168e-09	28	1484
	47	C0153676	Secondary malignant neoplasm of lung	DisGeNET BeFree	1.876e-12	2.018e-10	1.837e-09	9.483e-09	27	1370
	48	C0007785	Cerebral Infarction	DisGeNET BeFree	2.067e-12	2.177e-10	1.983e-09	1.045e-08	20	676
	49	C0036690	Septicemia	DisGeNET BeFree	2.738e-12	2.826e-10	2.573e-09	1.385e-08	26	1279
	50	C0376618	Endotoxemia	DisGeNET BeFree	4.686e-12	4.739e-10	4.315e-09	2.369e-08	15	332

## Sheet: 15429798
	ToppFun identified abnormalities associated with predicted target genes of chemical 15429798
		ID	Name	Source	pValue	FDR B&H	FDR B&Y	Bonferroni	Genes from Input	Genes in Annotation
	1	C0030193	Pain	DisGeNET BeFree	1.008e-18	5.614e-15	5.166e-14	5.614e-15	39	1480
	2	C0020538	Hypertensive disease	DisGeNET BeFree	9.852e-18	2.743e-14	2.524e-13	5.486e-14	43	1973
	3	C0524851	Neurodegenerative Disorders	DisGeNET BeFree	4.47e-16	8.297e-13	7.635e-12	2.489e-12	36	1480
	4	C0018802	Congestive heart failure	DisGeNET BeFree	3.115e-15	4.336e-12	3.99e-11	1.734e-11	36	1575
	5	C0007222	Cardiovascular Diseases	DisGeNET BeFree	1.284e-14	1.375e-11	1.265e-10	7.15e-11	35	1551
	6	C0027765	nervous system disorder	DisGeNET BeFree	1.5e-14	1.375e-11	1.265e-10	8.349e-11	28	942
	7	C0027831	Neurofibromatosis 1	DisGeNET BeFree	1.789e-14	1.375e-11	1.265e-10	9.96e-11	18	306
	8	C3539878	Triple Negative Breast Neoplasms	DisGeNET BeFree	2.002e-14	1.375e-11	1.265e-10	1.115e-10	36	1673
	9	C0018801	Heart failure	DisGeNET BeFree	2.319e-14	1.375e-11	1.265e-10	1.291e-10	33	1391
	10	C0024117	Chronic Obstructive Airway Disease	DisGeNET BeFree	2.469e-14	1.375e-11	1.265e-10	1.375e-10	31	1213
	11	C4722518	Triple-Negative Breast Carcinoma	DisGeNET BeFree	3.137e-14	1.588e-11	1.461e-10	1.746e-10	35	1598
	12	C0011570	Mental Depression	DisGeNET BeFree	3.846e-14	1.784e-11	1.642e-10	2.141e-10	33	1416
	13	C0338656	Impaired cognition	DisGeNET BeFree	9.612e-14	4.117e-11	3.789e-10	5.352e-10	32	1368
	14	C0027051	Myocardial Infarction	DisGeNET BeFree	1.445e-13	5.746e-11	5.288e-10	8.045e-10	34	1582
	15	C0011581	Depressive disorder	DisGeNET BeFree	3.229e-13	1.199e-10	1.103e-09	1.798e-09	32	1430
	16	C0344315	Depressed mood	DisGeNET BeFree	5.569e-13	1.938e-10	1.784e-09	3.101e-09	32	1459
	17	C0014544	Epilepsy	DisGeNET BeFree	1.145e-12	3.752e-10	3.452e-09	6.378e-09	28	1124
	18	C1956346	Coronary Artery Disease	DisGeNET BeFree	1.265e-12	3.912e-10	3.6e-09	7.042e-09	32	1504
	19	C0009241	Cognition Disorders	DisGeNET BeFree	1.446e-12	4.237e-10	3.899e-09	8.051e-09	21	584
	20	C0023903	Liver neoplasms	DisGeNET BeFree	1.99e-12	5.539e-10	5.097e-09	1.108e-08	29	1241
	21	C0233514	Abnormal behavior	DisGeNET BeFree	2.312e-12	6.13e-10	5.641e-09	1.287e-08	24	820
	22	C0009319	Colitis	DisGeNET BeFree	3.984e-12	1.008e-09	9.279e-09	2.218e-08	27	1094
	23	C0206698	Cholangiocarcinoma	DisGeNET BeFree	4.698e-12	1.131e-09	1.041e-08	2.616e-08	24	848
	24	C0400966	Non-alcoholic Fatty Liver Disease	DisGeNET BeFree	4.876e-12	1.131e-09	1.041e-08	2.715e-08	26	1016
	25	C0233794	Memory impairment	DisGeNET BeFree	1.034e-11	2.303e-09	2.12e-08	5.758e-08	21	648
	26	C0006118	Brain Neoplasms	DisGeNET BeFree	1.471e-11	3.15e-09	2.899e-08	8.19e-08	25	980
	27	C0026764	Multiple Myeloma	DisGeNET BeFree	2.175e-11	4.485e-09	4.127e-08	1.211e-07	32	1674
	28	C0025286	Meningioma	DisGeNET BeFree	2.424e-11	4.82e-09	4.436e-08	1.35e-07	20	605
	29	C0011884	Diabetic Retinopathy	DisGeNET BeFree	2.978e-11	5.718e-09	5.262e-08	1.658e-07	20	612
	30	C0035412	Rhabdomyosarcoma	DisGeNET BeFree	3.519e-11	6.531e-09	6.01e-08	1.959e-07	19	547
	31	C0424295	Hyperactive behavior	DisGeNET BeFree	4.345e-11	7.803e-09	7.181e-08	2.419e-07	26	1121
	32	C1269683	Major Depressive Disorder	DisGeNET BeFree	4.537e-11	7.895e-09	7.265e-08	2.526e-07	23	861
	33	C0024115	Lung diseases	DisGeNET BeFree	4.994e-11	8.427e-09	7.755e-08	2.781e-07	20	630
	34	C0280100	Solid Neoplasm	DisGeNET BeFree	6.787e-11	1.111e-08	1.023e-07	3.779e-07	26	1144
	35	C0162678	Neurofibromatoses	DisGeNET BeFree	8.552e-11	1.36e-08	1.252e-07	4.762e-07	11	134
	36	C0476089	Endometrial Carcinoma	DisGeNET BeFree	9.053e-11	1.4e-08	1.288e-07	5.041e-07	30	1555
	37	C0002736	Amyotrophic Lateral Sclerosis	DisGeNET BeFree	9.416e-11	1.417e-08	1.304e-07	5.243e-07	25	1069
	38	C0085281	Addictive Behavior	DisGeNET BeFree	1.263e-10	1.851e-08	1.703e-07	7.033e-07	15	330
	39	C0029408	Degenerative polyarthritis	DisGeNET BeFree	1.496e-10	2.136e-08	1.965e-07	8.33e-07	31	1694
	40	C0149925	Small cell carcinoma of lung	DisGeNET BeFree	1.616e-10	2.2e-08	2.024e-07	8.996e-07	23	918
	41	C1561643	Chronic Kidney Diseases	DisGeNET BeFree	1.62e-10	2.2e-08	2.024e-07	9.019e-07	24	1006
	42	C0027796	Neuralgia	DisGeNET BeFree	1.757e-10	2.329e-08	2.143e-07	9.781e-07	21	755
	43	C0030567	Parkinson Disease	DisGeNET BeFree	2.481e-10	3.212e-08	2.956e-07	1.381e-06	33	1952
	44	C0853897	Diabetic Cardiomyopathies	DisGeNET BeFree	2.925e-10	3.702e-08	3.407e-07	1.629e-06	12	193
	45	C0023418	leukemia	DisGeNET BeFree	3.793e-10	4.693e-08	4.318e-07	2.112e-06	33	1984
	46	C0036572	Seizures	DisGeNET BeFree	4.009e-10	4.75e-08	4.371e-07	2.232e-06	24	1052
	47	C0020456	Hyperglycemia	DisGeNET BeFree	4.009e-10	4.75e-08	4.371e-07	2.232e-06	24	1052
	48	C0013264	Muscular Dystrophy, Duchenne	DisGeNET BeFree	4.232e-10	4.909e-08	4.517e-07	2.356e-06	15	360
	49	C0856169	Endothelial dysfunction	DisGeNET BeFree	4.751e-10	5.398e-08	4.968e-07	2.645e-06	20	716
	50	C0027830	neurofibroma	DisGeNET BeFree	5.543e-10	6.173e-08	5.68e-07	3.086e-06	10	120

## Sheet: 10914
	ToppFun identified abnormalities associated with predicted target genes of chemical 10914
		ID	Name	Source	pValue	FDR B&H	FDR B&Y	Bonferroni	Genes from Input	Genes in Annotation
	1	C0030193	Pain	DisGeNET BeFree	1.008e-18	5.528e-15	5.078e-14	5.528e-15	39	1480
	2	C3203102	Idiopathic pulmonary arterial hypertension	DisGeNET BeFree	7.023e-17	1.925e-13	1.768e-12	3.85e-13	27	695
	3	C0007222	Cardiovascular Diseases	DisGeNET BeFree	2.787e-16	5.092e-13	4.678e-12	1.528e-12	37	1551
	4	C0027796	Neuralgia	DisGeNET BeFree	5.479e-16	7.509e-13	6.898e-12	3.004e-12	27	755
	5	C0020538	Hypertensive disease	DisGeNET BeFree	9.655e-14	1.059e-10	9.725e-10	5.293e-10	38	1973
	6	C3539878	Triple Negative Breast Neoplasms	DisGeNET BeFree	1.223e-13	1.118e-10	1.027e-09	6.705e-10	35	1673
	7	C2931822	Nasopharyngeal carcinoma	DisGeNET BeFree	1.445e-13	1.132e-10	1.04e-09	7.922e-10	33	1484
	8	C4722518	Triple-Negative Breast Carcinoma	DisGeNET BeFree	1.93e-13	1.322e-10	1.215e-09	1.058e-09	34	1598
	9	C0280100	Solid Neoplasm	DisGeNET BeFree	2.614e-13	1.592e-10	1.462e-09	1.433e-09	29	1144
	10	C0002736	Amyotrophic Lateral Sclerosis	DisGeNET BeFree	3.391e-13	1.859e-10	1.708e-09	1.859e-09	28	1069
	11	C2973725	Pulmonary arterial hypertension	DisGeNET BeFree	3.94e-13	1.964e-10	1.804e-09	2.16e-09	17	314
	12	C0151650	Renal fibrosis	DisGeNET BeFree	6.051e-13	2.566e-10	2.357e-09	3.317e-09	21	558
	13	C0302592	Cervix carcinoma	DisGeNET BeFree	6.085e-13	2.566e-10	2.357e-09	3.336e-09	36	1873
	14	C0036690	Septicemia	DisGeNET BeFree	6.709e-13	2.627e-10	2.413e-09	3.678e-09	30	1279
	15	C0011881	Diabetic Nephropathy	DisGeNET BeFree	8.278e-13	3.025e-10	2.779e-09	4.538e-09	28	1109
	16	C0376618	Endotoxemia	DisGeNET BeFree	9.681e-13	3.317e-10	3.047e-09	5.307e-09	17	332
	17	C0856169	Endothelial dysfunction	DisGeNET BeFree	1.08e-12	3.484e-10	3.201e-09	5.923e-09	23	716
	18	C4048328	cervical cancer	DisGeNET BeFree	1.203e-12	3.649e-10	3.352e-09	6.596e-09	35	1809
	19	C1956346	Coronary Artery Disease	DisGeNET BeFree	1.265e-12	3.649e-10	3.352e-09	6.933e-09	32	1504
	20	C0007847	Malignant tumor of cervix	DisGeNET BeFree	1.517e-12	4.038e-10	3.709e-09	8.317e-09	34	1718
	21	C1397307	Cardiac fibrosis	DisGeNET BeFree	1.547e-12	4.038e-10	3.709e-09	8.479e-09	16	290
	22	C0243026	Sepsis	DisGeNET BeFree	2.204e-12	5.492e-10	5.046e-09	1.208e-08	30	1340
	23	C1519670	Tumor Angiogenesis	DisGeNET BeFree	2.434e-12	5.802e-10	5.33e-09	1.335e-08	24	822
	24	C0239946	Fibrosis, Liver	DisGeNET BeFree	2.652e-12	6.057e-10	5.564e-09	1.454e-08	27	1075
	25	C0023418	leukemia	DisGeNET BeFree	3.347e-12	7.339e-10	6.742e-09	1.835e-08	36	1984
	26	C0003850	Arteriosclerosis	DisGeNET BeFree	3.937e-12	8.301e-10	7.626e-09	2.158e-08	36	1995
	27	C0004153	Atherosclerosis	DisGeNET BeFree	4.114e-12	8.354e-10	7.674e-09	2.255e-08	36	1998
	28	C0004364	Autoimmune Diseases	DisGeNET BeFree	4.413e-12	8.641e-10	7.938e-09	2.419e-08	33	1679
	29	C0524851	Neurodegenerative Disorders	DisGeNET BeFree	4.792e-12	8.936e-10	8.209e-09	2.627e-08	31	1480
	30	C0027051	Myocardial Infarction	DisGeNET BeFree	4.89e-12	8.936e-10	8.209e-09	2.681e-08	32	1582
	31	C0034069	Pulmonary Fibrosis	DisGeNET BeFree	5.725e-12	1.012e-09	9.3e-09	3.138e-08	24	856
	32	C0014544	Epilepsy	DisGeNET BeFree	7.45e-12	1.276e-09	1.173e-08	4.084e-08	27	1124
	33	C2711227	Steatohepatitis	DisGeNET BeFree	1.086e-11	1.804e-09	1.657e-08	5.952e-08	26	1053
	34	C0022658	Kidney Diseases	DisGeNET BeFree	1.259e-11	2.029e-09	1.864e-08	6.899e-08	26	1060
	35	C0041956	Ureteral obstruction	DisGeNET BeFree	1.869e-11	2.91e-09	2.674e-08	1.024e-07	16	342
	36	C0003864	Arthritis	DisGeNET BeFree	1.911e-11	2.91e-09	2.674e-08	1.048e-07	25	992
	37	C0035309	Retinal Diseases	DisGeNET BeFree	2.027e-11	3.004e-09	2.76e-08	1.111e-07	20	599
	38	C0338656	Impaired cognition	DisGeNET BeFree	2.159e-11	3.115e-09	2.861e-08	1.184e-07	29	1368
	39	C0034067	Pulmonary Emphysema	DisGeNET BeFree	2.223e-11	3.125e-09	2.871e-08	1.219e-07	16	346
	40	C0020429	Hyperalgesia	DisGeNET BeFree	2.321e-11	3.181e-09	2.923e-08	1.273e-07	16	347
	41	C0018801	Heart failure	DisGeNET BeFree	3.23e-11	4.318e-09	3.967e-08	1.77e-07	29	1391
	42	C0035412	Rhabdomyosarcoma	DisGeNET BeFree	3.519e-11	4.593e-09	4.219e-08	1.929e-07	19	547
	43	C0014175	Endometriosis	DisGeNET BeFree	4.364e-11	5.564e-09	5.111e-08	2.392e-07	25	1031
	44	C0030567	Parkinson Disease	DisGeNET BeFree	5.261e-11	6.554e-09	6.021e-08	2.884e-07	34	1952
	45	C0279550	Adult Rhabdomyosarcoma	DisGeNET BeFree	9.219e-11	1.123e-08	1.032e-07	5.054e-07	18	509
	46	C0015967	Fever	DisGeNET BeFree	9.662e-11	1.151e-08	1.058e-07	5.296e-07	22	811
	47	C0042373	Vascular Diseases	DisGeNET BeFree	1.139e-10	1.329e-08	1.221e-07	6.246e-07	20	660
	48	C0220611	Childhood Rhabdomyosarcoma	DisGeNET BeFree	1.187e-10	1.335e-08	1.226e-07	6.509e-07	18	517
	49	C0036421	Systemic Scleroderma	DisGeNET BeFree	1.193e-10	1.335e-08	1.226e-07	6.542e-07	23	904
	50	C0029408	Degenerative polyarthritis	DisGeNET BeFree	1.496e-10	1.64e-08	1.507e-07	8.201e-07	31	1694

## Sheet: 83247
	ToppFun identified abnormalities associated with predicted target genes of chemical 83247
		ID	Name	Source	pValue	FDR B&H	FDR B&Y	Bonferroni	Genes from Input	Genes in Annotation
	1	C4722518	Triple-Negative Breast Carcinoma	DisGeNET BeFree	1.025e-23	5.793e-20	5.339e-19	5.793e-20	52	1598
	2	C3539878	Triple Negative Breast Neoplasms	DisGeNET BeFree	8.441e-23	2.386e-19	2.199e-18	4.772e-19	52	1673
	3	C2938924	Oestrogen receptor positive breast cancer	DisGeNET BeFree	2.656e-17	5.005e-14	4.613e-13	1.501e-13	27	504
	4	C0011570	Mental Depression	DisGeNET BeFree	1.563e-16	1.864e-13	1.718e-12	8.833e-13	41	1416
	5	C0020538	Hypertensive disease	DisGeNET BeFree	1.649e-16	1.864e-13	1.718e-12	9.319e-13	48	1973
	6	C0524851	Neurodegenerative Disorders	DisGeNET BeFree	7.261e-16	6.841e-13	6.305e-12	4.104e-12	41	1480
	7	C0036341	Schizophrenia	DisGeNET Curated	1.548e-15	1.25e-12	1.152e-11	8.749e-12	32	883
	8	C1168401	Squamous cell carcinoma of the head and neck	DisGeNET BeFree	1.78e-15	1.258e-12	1.159e-11	1.006e-11	41	1519
	9	C0344315	Depressed mood	DisGeNET BeFree	2.611e-15	1.64e-12	1.512e-11	1.476e-11	40	1459
	10	C0030193	Pain	DisGeNET BeFree	4.216e-15	2.383e-12	2.197e-11	2.383e-11	40	1480
	11	C0023418	leukemia	DisGeNET BeFree	5.666e-15	2.912e-12	2.684e-11	3.203e-11	46	1984
	12	C0376545	Hematologic Neoplasms	DisGeNET BeFree	1.098e-14	5.174e-12	4.769e-11	6.209e-11	30	820
	13	C0023452	Childhood Acute Lymphoblastic Leukemia	DisGeNET BeFree	1.248e-14	5.427e-12	5.002e-11	7.055e-11	34	1086
	14	C0024299	Lymphoma	DisGeNET BeFree	1.519e-14	6.132e-12	5.652e-11	8.584e-11	39	1460
	15	C0476089	Endometrial Carcinoma	DisGeNET BeFree	2.183e-14	8.229e-12	7.585e-11	1.234e-10	40	1555
	16	C0011884	Diabetic Retinopathy	DisGeNET BeFree	2.771e-14	9.791e-12	9.024e-11	1.567e-10	26	612
	17	C0149925	Small cell carcinoma of lung	DisGeNET BeFree	3.167e-14	1.053e-11	9.708e-11	1.79e-10	31	918
	18	C1332977	Childhood Leukemia	DisGeNET BeFree	3.474e-14	1.091e-11	1.006e-10	1.964e-10	42	1740
	19	C0011581	Depressive disorder	DisGeNET BeFree	4.329e-14	1.288e-11	1.187e-10	2.447e-10	38	1430
	20	C0026764	Multiple Myeloma	DisGeNET BeFree	4.817e-14	1.361e-11	1.255e-10	2.723e-10	41	1674
	21	C0338656	Impaired cognition	DisGeNET BeFree	6.012e-14	1.619e-11	1.492e-10	3.399e-10	37	1368
	22	C0030567	Parkinson Disease	DisGeNET BeFree	7.688e-14	1.975e-11	1.821e-10	4.346e-10	44	1952
	23	C0007134	Renal Cell Carcinoma	DisGeNET BeFree	8.568e-14	2.106e-11	1.941e-10	4.844e-10	44	1958
	24	C0042769	Virus Diseases	DisGeNET BeFree	1.009e-13	2.376e-11	2.19e-10	5.703e-10	38	1469
	25	C0018802	Congestive heart failure	DisGeNET BeFree	1.741e-13	3.936e-11	3.628e-10	9.84e-10	39	1575
	26	C0027051	Myocardial Infarction	DisGeNET BeFree	2.005e-13	4.258e-11	3.925e-10	1.133e-09	39	1582
	27	C0014544	Epilepsy	DisGeNET BeFree	2.034e-13	4.258e-11	3.925e-10	1.15e-09	33	1124
	28	C1269683	Major Depressive Disorder	DisGeNET BeFree	2.673e-13	5.396e-11	4.973e-10	1.511e-09	29	861
	29	C0280100	Solid Neoplasm	DisGeNET BeFree	3.319e-13	6.471e-11	5.964e-10	1.876e-09	33	1144
	30	C0027765	nervous system disorder	DisGeNET BeFree	4.055e-13	7.641e-11	7.043e-10	2.292e-09	30	942
	31	C0233514	Abnormal behavior	DisGeNET BeFree	5.33e-13	9.656e-11	8.9e-10	3.013e-09	28	820
	32	C0007222	Cardiovascular Diseases	DisGeNET BeFree	5.466e-13	9.656e-11	8.9e-10	3.09e-09	38	1551
	33	C0424295	Hyperactive behavior	DisGeNET BeFree	1.092e-12	1.87e-10	1.724e-09	6.171e-09	32	1121
	34	C0020456	Hyperglycemia	DisGeNET BeFree	1.169e-12	1.944e-10	1.792e-09	6.609e-09	31	1052
	35	C0001430	Adenoma	DisGeNET BeFree	1.23e-12	1.986e-10	1.831e-09	6.952e-09	32	1126
	36	C0036690	Septicemia	DisGeNET BeFree	1.342e-12	2.06e-10	1.899e-09	7.587e-09	34	1279
	37	C0025286	Meningioma	DisGeNET BeFree	1.348e-12	2.06e-10	1.899e-09	7.623e-09	24	605
	38	C0029408	Degenerative polyarthritis	DisGeNET BeFree	1.729e-12	2.573e-10	2.371e-09	9.776e-09	39	1694
	39	C0007103	Malignant neoplasm of endometrium	DisGeNET BeFree	2.486e-12	3.604e-10	3.322e-09	1.406e-08	33	1231
	40	C0007847	Malignant tumor of cervix	DisGeNET BeFree	2.679e-12	3.712e-10	3.421e-09	1.515e-08	39	1718
	41	C0002726	Amyloidosis	DisGeNET BeFree	2.692e-12	3.712e-10	3.421e-09	1.522e-08	25	685
	42	C0018801	Heart failure	DisGeNET BeFree	2.773e-12	3.733e-10	3.441e-09	1.568e-08	35	1391
	43	C0023903	Liver neoplasms	DisGeNET BeFree	3.098e-12	4.073e-10	3.754e-09	1.751e-08	33	1241
	44	C0009319	Colitis	DisGeNET BeFree	3.231e-12	4.151e-10	3.826e-09	1.827e-08	31	1094
	45	C1332206	Adult Lymphoma	DisGeNET BeFree	3.335e-12	4.189e-10	3.861e-09	1.885e-08	32	1169
	46	C1332979	Childhood Lymphoma	DisGeNET BeFree	3.489e-12	4.288e-10	3.952e-09	1.972e-08	32	1171
	47	C1608408	Malignant transformation	DisGeNET BeFree	3.641e-12	4.38e-10	4.037e-09	2.058e-08	30	1027
	48	C1832661	ANOPHTHALMIA AND PULMONARY HYPOPLASIA	DisGeNET BeFree	3.998e-12	4.708e-10	4.34e-09	2.26e-08	35	1409
	49	C0011881	Diabetic Nephropathy	DisGeNET BeFree	4.591e-12	5.297e-10	4.882e-09	2.596e-08	31	1109
	50	C0009241	Cognition Disorders	DisGeNET BeFree	4.871e-12	5.448e-10	5.022e-09	2.753e-08	23	584

## Sheet: 5369495
	ToppFun identified abnormalities associated with predicted target genes of chemical 5369495
		ID	Name	Source	pValue	FDR B&H	FDR B&Y	Bonferroni	Genes from Input	Genes in Annotation
	1	C0030193	Pain	DisGeNET BeFree	6.855e-25	3.506e-21	3.196e-20	3.506e-21	44	1480
	2	C0524851	Neurodegenerative Disorders	DisGeNET BeFree	4.259e-17	5.03e-14	4.586e-13	2.178e-13	36	1480
	3	C0003850	Arteriosclerosis	DisGeNET BeFree	4.371e-17	5.03e-14	4.586e-13	2.235e-13	41	1995
	4	C0004153	Atherosclerosis	DisGeNET BeFree	4.611e-17	5.03e-14	4.586e-13	2.358e-13	41	1998
	5	C0014544	Epilepsy	DisGeNET BeFree	4.918e-17	5.03e-14	4.586e-13	2.515e-13	32	1124
	6	C0007222	Cardiovascular Diseases	DisGeNET BeFree	1.885e-16	1.607e-13	1.465e-12	9.639e-13	36	1551
	7	C0856169	Endothelial dysfunction	DisGeNET BeFree	2.767e-16	2.021e-13	1.843e-12	1.415e-12	26	716
	8	C3539878	Triple Negative Breast Neoplasms	DisGeNET BeFree	2.031e-15	1.298e-12	1.184e-11	1.039e-11	36	1673
	9	C0011570	Mental Depression	DisGeNET BeFree	4.797e-15	2.56e-12	2.334e-11	2.453e-11	33	1416
	10	C0020456	Hyperglycemia	DisGeNET BeFree	5.005e-15	2.56e-12	2.334e-11	2.56e-11	29	1052
	11	C0011581	Depressive disorder	DisGeNET BeFree	6.368e-15	2.96e-12	2.699e-11	3.256e-11	33	1430
	12	C0344315	Depressed mood	DisGeNET BeFree	1.133e-14	4.829e-12	4.403e-11	5.795e-11	33	1459
	13	C0018802	Congestive heart failure	DisGeNET BeFree	1.518e-14	5.972e-12	5.445e-11	7.764e-11	34	1575
	14	C0018801	Heart failure	DisGeNET BeFree	2.063e-14	7.536e-12	6.871e-11	1.055e-10	32	1391
	15	C4722518	Triple-Negative Breast Carcinoma	DisGeNET BeFree	2.321e-14	7.913e-12	7.215e-11	1.187e-10	34	1598
	16	C0424295	Hyperactive behavior	DisGeNET BeFree	2.566e-14	7.931e-12	7.231e-11	1.312e-10	29	1121
	17	C0024117	Chronic Obstructive Airway Disease	DisGeNET BeFree	2.636e-14	7.931e-12	7.231e-11	1.348e-10	30	1213
	18	C0004096	Asthma	DisGeNET BeFree	3.8e-14	1.08e-11	9.844e-11	1.943e-10	35	1731
	19	C3714636	Pneumonitis	DisGeNET BeFree	9.412e-14	2.533e-11	2.31e-10	4.813e-10	23	682
	20	C0027051	Myocardial Infarction	DisGeNET BeFree	1.131e-13	2.893e-11	2.637e-10	5.785e-10	33	1582
	21	C0400966	Non-alcoholic Fatty Liver Disease	DisGeNET BeFree	1.335e-13	3.251e-11	2.964e-10	6.827e-10	27	1016
	22	C0234251	Inflammatory pain	DisGeNET BeFree	1.493e-13	3.471e-11	3.164e-10	7.636e-10	16	266
	23	C0041296	Tuberculosis	DisGeNET BeFree	2.65e-13	5.892e-11	5.372e-10	1.355e-09	29	1229
	24	C0020538	Hypertensive disease	DisGeNET BeFree	3.182e-13	6.78e-11	6.182e-10	1.627e-09	36	1973
	25	C0023418	leukemia	DisGeNET BeFree	3.761e-13	7.693e-11	7.014e-10	1.923e-09	36	1984
	26	C0004364	Autoimmune Diseases	DisGeNET BeFree	5.993e-13	1.15e-10	1.048e-09	3.065e-09	33	1679
	27	C0032285	Pneumonia	DisGeNET BeFree	6.071e-13	1.15e-10	1.048e-09	3.105e-09	25	908
	28	C0009319	Colitis	DisGeNET BeFree	7.704e-13	1.375e-10	1.254e-09	3.94e-09	27	1094
	29	C0027796	Neuralgia	DisGeNET BeFree	7.797e-13	1.375e-10	1.254e-09	3.987e-09	23	755
	30	C0033860	Psoriasis	DisGeNET BeFree	9.748e-13	1.662e-10	1.515e-09	4.985e-09	27	1105
	31	C0236734	Caffeine related disorders	DisGeNET BeFree	1.223e-12	2.018e-10	1.84e-09	6.256e-09	17	360
	32	C0019196	Hepatitis C	DisGeNET BeFree	1.512e-12	2.417e-10	2.204e-09	7.735e-09	33	1736
	33	C0151650	Renal fibrosis	DisGeNET BeFree	1.644e-12	2.548e-10	2.323e-09	8.409e-09	20	558
	34	C0036572	Seizures	DisGeNET BeFree	2.21e-12	3.324e-10	3.03e-09	1.13e-08	26	1052
	35	C0243026	Sepsis	DisGeNET BeFree	2.294e-12	3.352e-10	3.056e-09	1.173e-08	29	1340
	36	C0002736	Amyotrophic Lateral Sclerosis	DisGeNET BeFree	3.175e-12	4.474e-10	4.079e-09	1.623e-08	26	1069
	37	C0026764	Multiple Myeloma	DisGeNET BeFree	3.237e-12	4.474e-10	4.079e-09	1.655e-08	32	1674
	38	C0036690	Septicemia	DisGeNET BeFree	4.675e-12	6.292e-10	5.736e-09	2.391e-08	28	1279
	39	C1561643	Chronic Kidney Diseases	DisGeNET BeFree	5.756e-12	7.433e-10	6.777e-09	2.944e-08	25	1006
	40	C0149925	Small cell carcinoma of lung	DisGeNET BeFree	5.814e-12	7.433e-10	6.777e-09	2.973e-08	24	918
	41	C0030567	Parkinson Disease	DisGeNET BeFree	7.104e-12	8.83e-10	8.05e-09	3.633e-08	34	1952
	42	C0011881	Diabetic Nephropathy	DisGeNET BeFree	7.252e-12	8.83e-10	8.05e-09	3.709e-08	26	1109
	43	C0023895	Liver diseases	DisGeNET BeFree	1.219e-11	1.45e-09	1.322e-08	6.235e-08	24	951
	44	C0280100	Solid Neoplasm	DisGeNET BeFree	1.452e-11	1.687e-09	1.538e-08	7.425e-08	26	1144
	45	C2711227	Steatohepatitis	DisGeNET BeFree	1.547e-11	1.758e-09	1.603e-08	7.912e-08	25	1053
	46	C0010054	Coronary Arteriosclerosis	DisGeNET BeFree	2.125e-11	2.362e-09	2.154e-08	1.087e-07	27	1262
	47	C0042769	Virus Diseases	DisGeNET BeFree	2.18e-11	2.372e-09	2.163e-08	1.115e-07	29	1469
	48	C0153676	Secondary malignant neoplasm of lung	DisGeNET BeFree	2.387e-11	2.521e-09	2.299e-08	1.221e-07	28	1370
	49	C0278488	Carcinoma breast stage IV	DisGeNET BeFree	2.458e-11	2.521e-09	2.299e-08	1.257e-07	19	573
	50	C0233794	Memory impairment	DisGeNET BeFree	2.465e-11	2.521e-09	2.299e-08	1.261e-07	20	648

[truncated: 9 more sheets: 6327366, 610161, 550234, 610035, Sheet1, Sheet2, Sheet3, Sheet4, Combined]
